# Supplementary material for: Primer-Dependent and Primer-Independent Initiation of Double Stranded RNA Synthesis by Purified Arabidopsis RNA-Dependent RNA Polymerases RDR2 and RDR6
Source: PubMed Central journal article supplement (PMC4368572; doi:10.1371/journal.pone.0120100), 2015-03-20
Supplement: pone.0120100.s005.pdf [file pone.0120100.s005.pdf]

## S1 Table. Primers sequences (5'-3').

|                |                                                                                                       |
|----------------|-------------------------------------------------------------------------------------------------------|
| AttB1-RDR2     | GGGGACAAGTTTGTACAAAAAAGCAGGCTTGatggtgtcagagacgacga<br>cgaaccgatc                                      |
| AttB2-RDR2     | GGGGACCACTTTGTACAAGAAAGCTGGGTCaatggatacaagtccactgttt<br>tctctc                                        |
| AttB1-RDR6     | GGGGACAAGTTTGTACAAAAAAGCAGGCTTGatggggtcagagggaaata<br>tgaagaagtc                                      |
| AttB2-RDR6     | GGGGACCACTTTGTACAAGAAAGCTGGGTCcgagacgctgagcagaaact<br>tagccaaag                                       |
| Age1-RDR2      | cgcgtaccggtATGGTGT CAGAGACGACGACGAACCG                                                                |
| SmaI-RDR2-2xHA | tgattcccgggTTAagcgtaatctggaacatcgatgggtaagcgtaatctggaacatcgatgg<br>gtaAATGGATACAAGTCCACTTGTTTTCTCTTCA |
| AgeI-RDR6      | tcgcgaccggtATGGGGTCAGAGGGAATATGA                                                                      |
| XhoI-2xHA-RDR6 | aggcctcgagTTATTAagcgtaatctggaacatcgatgggtaagcgtaatctggaacatcg<br>atgggtaGAGACGCTGAGCAAGAAAC           |
| RDR2mutFW      | GTTCTGGTGGCGATCTCGACGGAGCCCAGTTTTTTGTTAGCTGGG<br>ATGAGAAG                                             |
| RDR6mutFW      | GACCTTGACGGGGCCCTGTA CTTTGTGGCTTGGGATCAGAACTC<br>ATCCTC                                               |
