# Supplementary material for: Primer-Dependent and Primer-Independent Initiation of Double Stranded RNA Synthesis by Purified Arabidopsis RNA-Dependent RNA Polymerases RDR2 and RDR6
Source: PubMed Central journal article supplement (PMC4368572; doi:10.1371/journal.pone.0120100), 2015-03-20
Supplement: pone.0120100.s006.pdf [file pone.0120100.s006.pdf]

## S2 Table. RNA templates sequences (5'-3').

|          |                                         |
|----------|-----------------------------------------|
| RNA37A   | pAAUCGUGAACUUUCAACUAUACAACCUACUACCUCA   |
| RNA37U   | pUGAGGUAGUAGGUUGUAUAGUUUGAAAGUUCACGAUU  |
| RNA38    | pUUCAAACUAUACAACCUACUACCUCAAGGCUUCAAGCC |
| RNA24    | pUGAGGUAGUAGGUUGUAUAGUUUG               |
| RNA22    | pUGAGGUAGUAGGUUGUAUAGUU                 |
| RNA21    | pUGAGGUAGUAGGUUGUAUAGUU                 |
| RNA22ddC | pUGAGGUAGUAGGUUGUAUAGUddC               |
